# Supplementary material for: Abundance and Distribution of Microplastics in Invertebrate and Fish Species and Sediment Samples along the German Wadden Sea Coastline
Source: MDPI journal article supplement (doi:10.3390/ani13101698), 2023-05-20
Supplement: s1 [file s1]

**Table S1. (a)** Descriptive statistics of MP particles (items/g) in biota.

| Species                   | Feeding Type   | Location         | Year | Mean  | Median | Min   | Max    | Stdev | Variance | Mean gross weight | Mean net weight | 1 <sup>st</sup> . qu. | 3 <sup>rd</sup> . qu. | N  |
|---------------------------|----------------|------------------|------|-------|--------|-------|--------|-------|----------|-------------------|-----------------|-----------------------|-----------------------|----|
| <i>Arenicola marina</i>   | deposit feeder | Knockster Tief   | 2019 | 18.43 | 4.28   | 0.74  | 79.74  | 28.92 | 836.34   | 17.38             | -               | 2.67                  | 30.72                 | 21 |
|                           |                |                  | 2020 | 10.16 | 10.04  | 0.00  | 22.66  | 8.87  | 78.64    | 7.69              | -               | 1.96                  | 18.42                 | 13 |
|                           |                | Leybucht         | 2019 | 59.69 | 40.84  | 11.10 | 248.08 | 57.83 | 3344.64  | 2.37              | -               | 29.19                 | 67.04                 | 53 |
|                           |                |                  | 2020 | 1.42  | 0.40   | 0.00  | 4.38   | 1.74  | 3.04     | 14.36             | -               | 0.03                  | 3.25                  | 33 |
|                           |                | Neuharlingersiel | 2019 | 57.57 | 39.18  | 4.53  | 146.72 | 44.41 | 1972.69  | 2.40              | -               | 31.18                 | 83.08                 | 39 |
|                           |                |                  | 2020 | 0.46  | 0.43   | 0.41  | 0.56   | 0.06  | 0.00     | 24.47             | -               | 0.41                  | 0.51                  | 25 |
|                           |                | Jadebusen        | 2019 | -     | -      | -     | -      | -     | -        | -                 | -               | -                     | -                     | 0  |
|                           |                |                  | 2020 | -     | -      | -     | -      | -     | -        | -                 | -               | -                     | -                     | 0  |
|                           |                | Tettens          | 2019 | 16.13 | 3.05   | 0.00  | 72.95  | 24.28 | 589.36   | 3.18              | -               | 0.00                  | 31.72                 | 32 |
|                           |                |                  | 2020 | 3.61  | 3.86   | 0.00  | 7.50   | 3.13  | 9.81     | 10.80             | -               | 0.21                  | 6.86                  | 24 |
|                           |                | Cappel-Neufeld   | 2019 | 15.71 | 11.43  | 0.70  | 45.93  | 16.03 | 256.88   | 13.99             | -               | 1.99                  | 29.67                 | 28 |
|                           |                |                  | 2020 | 1.51  | 1.12   | 0.00  | 4.66   | 1.41  | 1.98     | 14.32             | -               | 0.37                  | 2.54                  | 40 |
| <i>Littorina littorea</i> | grazer         | Knockster Tief   | 2019 | 2.77  | 2.78   | 0.77  | 4.75   | 1.51  | 2.29     | 24.16             | 5.85            | 1.51                  | 4.00                  | 61 |
|                           |                |                  | 2020 | 1.95  | 1.77   | 1.77  | 2.31   | 0.31  | 0.10     | 15.52             | 3.93            | 1.77                  | 0.00                  | 45 |
|                           |                | Leybucht         | 2019 | 5.72  | 4.92   | 1.60  | 11.59  | 3.95  | 15.58    | 47.78             | 11.90           | 2.31                  | 9.52                  | 68 |
|                           |                |                  | 2020 | 2.24  | 2.40   | 0.00  | 4.32   | 2.16  | 4.68     | 34.92             | 7.76            | 0.00                  | 0.00                  | 45 |

|                       |               |                  |      |       |       |       |       |       |        |       |       |       |       |     |
|-----------------------|---------------|------------------|------|-------|-------|-------|-------|-------|--------|-------|-------|-------|-------|-----|
|                       |               | Neuharlingersiel | 2019 | 9.09  | 5.37  | 5.01  | 17.49 | 5.99  | 35.91  | 20.63 | 6.16  | 5.14  | 16.46 | 80  |
|                       |               |                  | 2020 | 1.89  | 0.97  | 0.47  | 4.23  | 2.04  | 4.17   | 68.93 | 3.96  | 0.47  | 0.00  | 36  |
|                       |               | Jadebusen        | 2019 | 4.21  | 2.17  | 0.00  | 11.65 | 5.09  | 25.92  | 18.71 | 6.02  | 1.37  | 11.20 | 106 |
|                       |               |                  | 2020 | 6.44  | 8.07  | 2.52  | 8.73  | 3.41  | 11.63  | 18.72 | 5.80  | 2.52  | 0.00  | 44  |
|                       |               | Tettens          | 2019 | -     | -     | -     | -     | -     | -      | -     | -     | -     | -     | 0   |
|                       |               |                  | 2020 | -     | -     | -     | -     | -     | -      | -     | -     | -     | -     | 0   |
|                       |               | Cappel-Neufeld   | 2019 | 1.28  | 0.98  | 0.27  | 3.21  | 1.13  | 1.27   | 39.90 | 10.40 | 0.53  | 2.17  | 78  |
|                       |               |                  | 2020 | 0.68  | 0.68  | 0.00  | 1.35  | 0.95  | 0.91   | 41.42 | 11.22 | 0,00  | 0.00  | 20  |
| <i>Mytilus edulis</i> | filter feeder | Knockster Tief   | 2019 | 6.54  | 4.99  | 0.55  | 20.81 | 5.95  | 35.36  | 33.75 | 15.10 | 1.39  | 10.21 | 117 |
|                       |               |                  | 2020 | 3.50  | 2.07  | 0.00  | 18.59 | 5.13  | 26.36  | 53.49 | 16.12 | 0.13  | 4.71  | 60  |
|                       |               | Leybucht         | 2019 | 4.64  | 4.51  | 0.33  | 9.52  | 3.19  | 10.16  | 46.08 | 14.42 | 1.75  | 7.93  | 67  |
|                       |               |                  | 2020 | 0.46  | 0.00  | 0.00  | 2.49  | 0.87  | 0.75   | 37.99 | 21.77 | 0.00  | 0.31  | 60  |
|                       |               | Neuharlingersiel | 2019 | 13.06 | 12.16 | 10.13 | 18.14 | 3.16  | 9.97   | 40.29 | 16.85 | 10.58 | 15.99 | 24  |
|                       |               |                  | 2020 | 1.82  | 0.05  | 0.00  | 9.52  | 3.11  | 9.67   | 21.66 | 7.56  | 0.00  | 3.52  | 49  |
|                       |               | Jadebusen        | 2019 | 4.39  | 4.02  | 0.91  | 9.33  | 2.32  | 5.39   | 22.99 | 8.16  | 2.67  | 4.61  | 113 |
|                       |               |                  | 2020 | 0.20  | 0.23  | 0.00  | 0.52  | 0.21  | 0.04   | 21.22 | 6.94  | 0.00  | 0.37  | 33  |
|                       |               | Tettens          | 2019 | 4.30  | 3.95  | 0.66  | 9.05  | 2.60  | 6.74   | 36.18 | 17.32 | 1.92  | 6.18  | 50  |
|                       |               |                  | 2020 | 1.93  | 1.67  | 0.00  | 5.56  | 2.10  | 4.40   | 33.92 | 13.21 | 0.00  | 3.38  | 31  |
|                       |               | Cappel-Neufeld   | 2019 | 8.59  | 4.12  | 1.08  | 33.86 | 10.42 | 108.61 | 37.67 | 16.23 | 1.60  | 16.79 | 53  |

|                           |          |            |      |      |      |      |       |      |       |        |       |      |      |    |
|---------------------------|----------|------------|------|------|------|------|-------|------|-------|--------|-------|------|------|----|
|                           |          |            | 2020 | 0.81 | 0.45 | 0.00 | 3.31  | 1.19 | 1.41  | 53.93  | 21.16 | 0.00 | 1.11 | 37 |
| <i>Platichthys flesus</i> | demersal | Borkum     | 2018 | 2.38 | 0.58 | 0.00 | 47.32 | 6.89 | 47.49 | 140.44 | 7.50  | 0.22 | 2.38 | 47 |
|                           |          |            | 2020 | 0.66 | 0.14 | 0.00 | 3.79  | 1.04 | 1.09  | 164.78 | 9.38  | 0.00 | 0.70 | 41 |
|                           |          | Baltrum    | 2018 | 1.31 | 0.50 | 0.00 | 11.67 | 2.00 | 4.02  | 164.11 | 8.28  | 0.14 | 1.74 | 53 |
|                           |          |            | 2020 | 2.00 | 0.76 | 0.00 | 16.46 | 3.32 | 11.00 | 140.19 | 11.24 | 0.13 | 2.33 | 41 |
|                           |          | Außenjade  | 2018 | 2.08 | 1.02 | 0.00 | 17.80 | 3.16 | 9.98  | 174.14 | 11.38 | 0.39 | 2.35 | 43 |
|                           |          |            | 2020 | -    | -    | -    | -     | -    | -     | -      | -     | -    | -    | 0  |
|                           |          | Außenweser | 2018 | 0.70 | 0.45 | 0.00 | 4.48  | 0.90 | 0.80  | 181.79 | 14.66 | 0.00 | 0.95 | 44 |
|                           |          |            | 2020 | 0.75 | 0.46 | 0.00 | 3.68  | 0.97 | 0.93  | 177.72 | 11.41 | 0.00 | 0.90 | 41 |

**Table S1. (b)** Descriptive statistics of MP fibers (items/g) in biota.

| Species                 | Feeding Type   | Location         | Year | Mean | Median | Min  | Max   | Stdev | Variance | Mean gross weight | Mean net weight | 1 <sup>st</sup> . qu. | 3 <sup>rd</sup> . qu. | N  |
|-------------------------|----------------|------------------|------|------|--------|------|-------|-------|----------|-------------------|-----------------|-----------------------|-----------------------|----|
| <i>Arenicola marina</i> | deposit feeder | Knockster Tief   | 2019 | 1.12 | 0.20   | 0.00 | 3.92  | 1.71  | 2.91     | 17.38             | -               | 0.00                  | 3.27                  | 21 |
|                         |                |                  | 2020 | 0.31 | 0.23   | 0.00 | 0.84  | 0.34  | 0.12     | 7.69              | -               | 0.03                  | 0.64                  | 13 |
|                         |                | Leybucht         | 2019 | 2.78 | 1.87   | 0.00 | 15.38 | 3.44  | 11.81    | 2.37              | -               | 1.11                  | 3.72                  | 53 |
|                         |                |                  | 2020 | 0.05 | 0.00   | 0.00 | 0.33  | 0.11  | 0.01     | 14.36             | -               | 0.00                  | 0.07                  | 33 |
|                         |                | Neuharlingersiel | 2019 | 1.15 | 1.18   | 0.00 | 2.62  | 0.72  | 0.51     | 2.40              | -               | 0.72                  | 1.65                  | 39 |
|                         |                |                  | 2020 | 0.08 | 0.07   | 0.04 | 0.16  | 0.05  | 0.00     | 24.47             | -               | 0.04                  | 0.13                  | 25 |

|                           |        |                  |      |      |      |      |      |      |      |       |       |      |      |     |
|---------------------------|--------|------------------|------|------|------|------|------|------|------|-------|-------|------|------|-----|
|                           |        | Jadebusen        | 2019 | -    | -    | -    | -    | -    | -    | -     | -     | -    | -    | 0   |
|                           |        |                  | 2020 | -    | -    | -    | -    | -    | -    | -     | -     | -    | -    | 0   |
|                           |        | Tettens          | 2019 | 0.45 | 0.26 | 0.00 | 1.38 | 0.52 | 0.27 | 3.18  | -     | 0.00 | 0.85 | 32  |
|                           |        |                  | 2020 | 0.18 | 0.03 | 0.00 | 0.65 | 0.27 | 0.07 | 10.80 | -     | 0.00 | 0.46 | 24  |
|                           |        | Cappel-Neufeld   | 2019 | 0.24 | 0.00 | 0.00 | 1.07 | 0.41 | 0.17 | 13.99 | -     | 0.00 | 0.49 | 28  |
|                           |        |                  | 2020 | 0.13 | 0.07 | 0.00 | 0.49 | 0.15 | 0.02 | 14.32 | -     | 0.00 | 0.22 | 40  |
| <i>Littorina littorea</i> | grazer | Knockster Tief   | 2019 | 0.16 | 0.03 | 0.00 | 0.81 | 0.32 | 0.10 | 24.16 | 5.85  | 0.00 | 0.26 | 61  |
|                           |        |                  | 2020 | 0.08 | 0.00 | 0.00 | 0.25 | 0.14 | 0.02 | 15.52 | 3.93  | 0.00 | 0.00 | 45  |
|                           |        | Leybucht         | 2019 | 0.09 | 0.04 | 0.00 | 0.36 | 0.15 | 0.02 | 47.78 | 11.90 | 0.00 | 0.19 | 68  |
|                           |        |                  | 2020 | 0.00 | 0.00 | 0.00 | 0.00 | 0.00 | 0.00 | 34.92 | 7.76  | 0.00 | 0.00 | 45  |
|                           |        | Neuharlingersiel | 2019 | 0.19 | 0.17 | 0.01 | 0.48 | 0.16 | 0.03 | 20.63 | 6.16  | 0.06 | 0.28 | 80  |
|                           |        |                  | 2020 | 0.00 | 0.00 | 0.00 | 0.00 | 0.00 | 0.00 | 68.93 | 3.96  | 0.00 | 0.00 | 36  |
|                           |        | Jadebusen        | 2019 | 0.04 | 0.02 | 0.00 | 0.16 | 0.06 | 0.00 | 18.71 | 6.02  | 0.00 | 0.04 | 106 |
|                           |        |                  | 2020 | 0.20 | 0.14 | 0.00 | 0.46 | 0.24 | 0.06 | 18.72 | 5.80  | 0.00 | 0.00 | 44  |
|                           |        | Tettens          | 2019 | -    | -    | -    | -    | -    | -    | -     | -     | -    | -    | 0   |
|                           |        |                  | 2020 | -    | -    | -    | -    | -    | -    | -     | -     | -    | -    | 0   |
|                           |        | Cappel-Neufeld   | 2019 | 0.03 | 0.00 | 0.00 | 0.09 | 0.05 | 0.00 | 39.90 | 10.40 | 0.00 | 0.08 | 78  |
|                           |        |                  | 2020 | 0.02 | 0.02 | 0.00 | 0.03 | 0.02 | 0.00 | 41.42 | 11.22 | 0.00 | 0.00 | 20  |
| <i>Mytilus edulis</i>     |        | Knockster Tief   | 2019 | 0.34 | 0.21 | 0.02 | 0.97 | 0.32 | 0.10 | 33.75 | 15.10 | 0.06 | 0.66 | 117 |

|                           |               |                  |      |      |      |      |      |      |      |        |       |      |      |     |
|---------------------------|---------------|------------------|------|------|------|------|------|------|------|--------|-------|------|------|-----|
|                           | filter feeder |                  | 2020 | 0.06 | 0.06 | 0.00 | 0.17 | 0.07 | 0.00 | 53.49  | 16.12 | 0.00 | 0.12 | 60  |
|                           |               | Leybucht         | 2019 | 0.14 | 0.12 | 0.00 | 0.46 | 0.11 | 0.01 | 46.08  | 14.42 | 0.07 | 0.14 | 67  |
|                           |               |                  | 2020 | 0.03 | 0.00 | 0.00 | 0.39 | 0.11 | 0.01 | 37.99  | 21.77 | 0.00 | 0.00 | 60  |
|                           |               | Neuharlingersiel | 2019 | 0.08 | 0.00 | 0.00 | 0.23 | 0.11 | 0.01 | 40.29  | 16.85 | 0.00 | 0.20 | 24  |
|                           |               |                  | 2020 | 0.04 | 0.00 | 0.00 | 0.25 | 0.08 | 0.01 | 21.66  | 7.56  | 0.00 | 0.02 | 49  |
|                           |               | Jadebusen        | 2019 | 0.46 | 0.32 | 0.12 | 2.61 | 0.51 | 0.26 | 22.99  | 8.16  | 0.22 | 0.46 | 113 |
|                           |               |                  | 2020 | 0.07 | 0.00 | 0.00 | 0.28 | 0.13 | 0.02 | 21.22  | 6.94  | 0.00 | 0.23 | 33  |
|                           |               | Tettens          | 2019 | 0.12 | 0.09 | 0.00 | 0.54 | 0.17 | 0.03 | 36.18  | 17.32 | 0.00 | 0.19 | 50  |
|                           |               |                  | 2020 | 0.06 | 0.05 | 0.00 | 0.17 | 0.07 | 0.01 | 33.92  | 13.21 | 0.00 | 0.11 | 31  |
|                           |               | Cappel-Neufeld   | 2019 | 0.29 | 0.35 | 0.00 | 0.60 | 0.20 | 0.04 | 37.67  | 16.23 | 0.07 | 0.47 | 53  |
|                           |               |                  | 2020 | 0.02 | 0.00 | 0.00 | 0.06 | 0.03 | 0.00 | 53.93  | 21.16 | 0.00 | 0.50 | 37  |
| <i>Platichthys flesus</i> | demersa 1     | Borkum           | 2018 | 0.08 | 0.00 | 0.00 | 1.05 | 0.19 | 0.04 | 140.44 | 7.50  | 0.00 | 0.10 | 47  |
|                           |               |                  | 2020 | 0.02 | 0.00 | 0.00 | 0.33 | 0.07 | 0.00 | 164.78 | 9.38  | 0.00 | 0.00 | 41  |
|                           |               | Baltrum          | 2018 | 0.06 | 0.00 | 0.00 | 0.57 | 0.11 | 0.01 | 164.11 | 8.28  | 0.00 | 0.08 | 53  |
|                           |               |                  | 2020 | 0.01 | 0.00 | 0.00 | 0.16 | 0.04 | 0.00 | 140.19 | 11.24 | 0.00 | 0.00 | 41  |
|                           |               | Außenjade        | 2018 | 0.05 | 0.00 | 0.00 | 0.51 | 0.10 | 0.01 | 174.14 | 11.38 | 0.00 | 0.08 | 43  |
|                           |               |                  | 2020 | -    | -    | -    | -    | -    | -    | -      | -     | -    | -    | 0   |
|                           |               | Außenweser       | 2018 | 0.02 | 0.00 | 0.00 | 0.29 | 0.06 | 0.00 | 181.79 | 14.66 | 0.00 | 0.00 | 44  |
|                           |               |                  | 2020 | 0.02 | 0.00 | 0.00 | 0.28 | 0.05 | 0.00 | 177.72 | 11.41 | 0.00 | 0.00 | 41  |

**Table S1. (c)** Descriptive statistics of MP fragments (items/g) in biota.

| Species                   | Feeding Type   | Location         | Year | Mean  | Median | Min  | Max    | Stdev | Variance | Mean gross weight | Mean net weight | 1 <sup>st</sup> . qu. | 3 <sup>rd</sup> . qu. | N  |
|---------------------------|----------------|------------------|------|-------|--------|------|--------|-------|----------|-------------------|-----------------|-----------------------|-----------------------|----|
| <i>Arenicola marina</i>   | deposit feeder | Knockster Tief   | 2019 | 8.66  | 1.59   | 0.00 | 73.20  | 19.92 | 396.62   | 17.38             | -               | 0.00                  | 4.86                  | 21 |
|                           |                |                  | 2020 | 4.93  | 0.24   | 0.00 | 22.22  | 7.73  | 59.77    | 7.69              | -               | 0.00                  | 10.08                 | 13 |
|                           |                | Leybucht         | 2019 | 28.45 | 6.18   | 0.00 | 230.77 | 47.61 | 2266.34  | 2.37              | -               | 0.00                  | 39.31                 | 53 |
|                           |                |                  | 2020 | 0.68  | 0.00   | 0.00 | 4.38   | 1.36  | 1.86     | 14.36             | -               | 0.00                  | 0.55                  | 33 |
|                           |                | Neuharlingersiel | 2019 | 28.21 | 6.70   | 0.00 | 136.89 | 39.86 | 1589.00  | 2.40              | -               | 0.47                  | 37.97                 | 39 |
|                           |                |                  | 2020 | 0.19  | 0.16   | 0.00 | 0.42   | 0.20  | 0.04     | 24.47             | -               | 0.00                  | 0.38                  | 25 |
|                           |                | Jadebusen        | 2019 | -     | -      | -    | -      | -     | -        | -                 | -               | -                     | -                     | 0  |
|                           |                |                  | 2020 | -     | -      | -    | -      | -     | -        | -                 | -               | -                     | -                     | 0  |
|                           |                | Tettens          | 2019 | 7.84  | 0.00   | 0.00 | 72.95  | 18.53 | 343.41   | 3.18              | -               | 0.00                  | 2.47                  | 32 |
|                           |                |                  | 2020 | 1.72  | 0.20   | 0.00 | 6.98   | 2.60  | 6.78     | 10.80             | -               | 0.00                  | 3.64                  | 24 |
|                           |                | Cappel-Neufeld   | 2019 | 7.74  | 1.36   | 0.00 | 43.65  | 12.98 | 168.59   | 13.99             | -               | 0.70                  | 11.39                 | 28 |
|                           |                |                  | 2020 | 0.69  | 0.07   | 0.00 | 4.52   | 1.16  | 1.35     | 14.32             | -               | 0.00                  | 1.09                  | 40 |
| <i>Littorina littorea</i> | grazer         | Knockster Tief   | 2019 | 1.13  | 0.39   | 0.00 | 3.76   | 1.48  | 2.20     | 24.16             | 5.85            | 0.00                  | 2.57                  | 61 |
|                           |                |                  | 2020 | 0.93  | 0.76   | 0.00 | 2.31   | 1.05  | 1.11     | 15.52             | 3.93            | 0.00                  | 1.90                  | 45 |
|                           |                | Leybucht         | 2019 | 2.71  | 0.80   | 0.00 | 11.09  | 3.75  | 14.08    | 47.78             | 11.90           | 0.05                  | 5.04                  | 68 |

|                       |               |                  |      |      |      |      |       |      |       |       |       |      |       |     |
|-----------------------|---------------|------------------|------|------|------|------|-------|------|-------|-------|-------|------|-------|-----|
|                       |               |                  | 2020 | 1.12 | 0.00 | 0.00 | 4.32  | 1.84 | 3.38  | 34.92 | 7.76  | 0.00 | 2.88  | 45  |
|                       |               | Neuharlingersiel | 2019 | 4.16 | 3.23 | 0.08 | 14.75 | 4.67 | 21.81 | 20.63 | 6.16  | 0.20 | 5.10  | 80  |
|                       |               |                  | 2020 | 0.95 | 0.32 | 0.00 | 4.23  | 1.64 | 2.69  | 68.93 | 3.96  | 0.00 | 1.66  | 36  |
|                       |               | Jadebusen        | 2019 | 1.99 | 0.48 | 0.00 | 11.13 | 3.93 | 15.46 | 18.71 | 6.02  | 0.00 | 2.32  | 106 |
|                       |               |                  | 2020 | 3.12 | 1.17 | 0.00 | 8.59  | 3.91 | 15.25 | 18.72 | 5.80  | 0.17 | 7.81  | 44  |
|                       |               | Tettens          | 2019 | -    | -    | -    | -     | -    | -     | -     | -     | -    | -     | 0   |
|                       |               |                  | 2020 | -    | -    | -    | -     | -    | -     | -     | -     | -    | -     | 0   |
|                       |               | Cappel-Neufeld   | 2019 | 0.62 | 0.18 | 0.00 | 3.12  | 0.96 | 0.92  | 39.90 | 10.40 | 0.00 | 0.91  | 78  |
|                       |               |                  | 2020 | 0.30 | 0.03 | 0.00 | 1.29  | 0.67 | 0.45  | 41.42 | 11.22 | 0.00 | 0.98  | 20  |
|                       |               |                  |      |      |      |      |       |      |       |       |       |      |       |     |
| <i>Mytilus edulis</i> | filter feeder | Knockster Tief   | 2019 | 3.10 | 0.60 | 0.00 | 20.14 | 5.06 | 25.62 | 33.75 | 15.10 | 0.00 | 4.46  | 117 |
|                       |               |                  | 2020 | 1.72 | 0.12 | 0.00 | 18.39 | 3.89 | 15.13 | 53.49 | 16.12 | 0.00 | 2.10  | 60  |
|                       |               | Leybucht         | 2019 | 2.25 | 0.34 | 0.00 | 8.95  | 3.09 | 9.55  | 46.08 | 14.42 | 0.00 | 4.57  | 67  |
|                       |               |                  | 2020 | 0.21 | 0.00 | 0.00 | 2.09  | 0.59 | 0.34  | 37.99 | 21.77 | 0.00 | 0.00  | 60  |
|                       |               | Neuharlingersiel | 2019 | 6.49 | 5.38 | 0.42 | 17.09 | 6.37 | 40.58 | 40.29 | 16.85 | 0.75 | 11.56 | 24  |
|                       |               |                  | 2020 | 0.89 | 0.00 | 0.00 | 9.52  | 2.34 | 5.46  | 21.66 | 7.56  | 0.00 | 0.00  | 49  |
|                       |               | Jadebusen        | 2019 | 1.96 | 0.87 | 0.00 | 8.59  | 2.41 | 5.79  | 22.99 | 8.16  | 0.00 | 3.58  | 113 |
|                       |               |                  | 2020 | 0.06 | 0.00 | 0.00 | 0.52  | 0.16 | 0.03  | 21.22 | 6.94  | 0.00 | 0.00  | 33  |
|                       |               | Tettens          | 2019 | 2.09 | 0.87 | 0.00 | 8.01  | 2.55 | 6.48  | 36.18 | 17.32 | 0.05 | 4.05  | 50  |
|                       |               |                  | 2020 | 0.93 | 0.03 | 0.00 | 5.01  | 1.57 | 2.46  | 33.92 | 13.21 | 0.00 | 1.82  | 31  |

|                           |          |                |      |      |      |      |       |      |       |        |       |      |      |    |
|---------------------------|----------|----------------|------|------|------|------|-------|------|-------|--------|-------|------|------|----|
| <i>Platichthys flesus</i> | demersal | Cappel-Neufeld | 2019 | 4.15 | 1.38 | 0.00 | 31.66 | 7.68 | 59.02 | 37.67  | 16.23 | 0.02 | 4.00 | 53 |
|                           |          |                | 2020 | 0.40 | 0.00 | 0.91 | 0.82  | 0.00 | 3.31  | 53.93  | 21.16 | 0.00 | 0.49 | 37 |
|                           |          | Borkum         | 2018 | 1.15 | 0.00 | 0.00 | 45.22 | 4.77 | 22.78 | 140.44 | 7.50  | 0.00 | 0.66 | 47 |
|                           |          |                | 2020 | 0.32 | 0.00 | 0.00 | 3.79  | 0.80 | 0.63  | 164.78 | 9.38  | 0.00 | 0.11 | 41 |
|                           |          | Baltrum        | 2018 | 0.63 | 0.00 | 0.00 | 11.67 | 1.52 | 2.30  | 164.11 | 8.28  | 0.00 | 0.46 | 53 |
|                           |          |                | 2020 | 1.00 | 0.00 | 0.00 | 16.03 | 2.49 | 6.20  | 140.19 | 11.24 | 0.00 | 0.73 | 41 |
|                           |          | Außenjade      | 2018 | 1.01 | 0.08 | 0.00 | 17.80 | 2.42 | 5.87  | 174.14 | 11.38 | 0.00 | 1.03 | 43 |
|                           |          |                | 2020 | -    | -    | -    | -     | -    | -     | -      | -     | -    | -    | 0  |
|                           |          | Außenweser     | 2018 | 0.34 | 0.00 | 0.00 | 4.15  | 0.69 | 0.48  | 181.79 | 14.66 | 0.00 | 0.36 | 44 |
|                           |          |                | 2020 | 0.37 | 0.00 | 0.00 | 3.54  | 0.72 | 0.52  | 177.72 | 11.41 | 0.00 | 0.43 | 41 |

**Table S2. (a)** Descriptive statistics of MP particles (items/individual) in biota.

| Species                 | Feeding Type   | Location       | Year | Mean  | Median | Min   | Max    | Stdev | Variance | Mean gross weight | Mean net weight | 1 <sup>st</sup> . qu. | 3 <sup>rd</sup> . qu. | N  |
|-------------------------|----------------|----------------|------|-------|--------|-------|--------|-------|----------|-------------------|-----------------|-----------------------|-----------------------|----|
| <i>Arenicola marina</i> | deposit feeder | Knockster Tief | 2019 | 26.67 | 17.33  | 4.33  | 82.00  | 27.20 | 739.64   | 17.38             | -               | 5.67                  | 40.67                 | 21 |
|                         |                |                | 2020 | 20.33 | 20.67  | 0.00  | 52.00  | 19.80 | 392.22   | 7.69              | -               | 4.00                  | 36.50                 | 13 |
|                         |                | Leybucht       | 2019 | 26.00 | 23.34  | 15.54 | 241.50 | 7.67  | 64.50    | 2.37              | -               | 12.50                 | 33.33                 | 53 |
|                         |                |                | 2020 | 4.13  | 1.00   | 0.00  | 15.80  | 5.36  | 28.68    | 14.36             | -               | 0.16                  | 7.06                  | 33 |



|                           |        |                  |      |       |       |      |       |       |        |       |       |           |       |     |   |
|---------------------------|--------|------------------|------|-------|-------|------|-------|-------|--------|-------|-------|-----------|-------|-----|---|
|                           |        | Neuharlingersiel | 2019 | 36.33 | 31.33 | 8.33 | 69.00 | 22.59 | 510.43 | 2.40  | -     | 16.3<br>3 | 61.50 | 39  |   |
|                           |        |                  | 2020 | 2.15  | 2.00  | 1.40 | 3.60  | 0.86  | 0.75   | 24.47 | -     | 1.50      | 2.88  | 25  |   |
|                           |        | Jadebusen        | 2019 | -     | -     | -    | -     | -     | -      | -     | -     | -         | -     | -   | 0 |
|                           |        |                  | 2020 | -     | -     | -    | -     | -     | -      | -     | -     | -         | -     | -   | 0 |
|                           |        | Tettens          | 2019 | 10.42 | 7.67  | 0.00 | 50.33 | 15.05 | 226.44 | 3.18  | -     | 7.67      | 15.33 | 32  |   |
|                           |        |                  | 2020 | 10.67 | 8.84  | 0.00 | 27.00 | 10.08 | 101.60 | 10.80 | -     | 1.33      | 20.83 | 24  |   |
|                           |        | Cappel-Neufeld   | 2019 | 25.15 | 18.67 | 6.00 | 94.00 | 27.61 | 762.37 | 13.99 | -     | 8.16      | 30.33 | 28  |   |
|                           |        |                  | 2020 | 6.35  | 4.50  | 0.00 | 21.00 | 6.27  | 39.37  | 14.32 | -     | 1.16      | 10.00 | 40  |   |
| <i>Littorina littorea</i> | grazer | Knockster Tief   | 2019 | 1.76  | 1.29  | 0.67 | 3.86  | 1.23  | 1.50   | 24.16 | 5.85  | 0.81      | 2.89  | 61  |   |
|                           |        |                  | 2020 | 0.51  | 0.47  | 0.47 | 0.60  | 0.08  | 0.01   | 15.52 | 3.93  | 0.47      | 0.00  | 45  |   |
|                           |        | Leybucht         | 2019 | 5.16  | 5.00  | 1.14 | 10.80 | 3.73  | 13.90  | 47.78 | 11.90 | 1.88      | 8.52  | 68  |   |
|                           |        |                  | 2020 | 1.13  | 1.33  | 0.00 | 2.07  | 1.05  | 1.10   | 34.92 | 7.76  | 0.00      | 0.00  | 45  |   |
|                           |        | Neuharlingersiel | 2019 | 3.51  | 2.94  | 2.07 | 6.40  | 1.72  | 2.95   | 20.63 | 6.16  | 2.16      | 4.99  | 80  |   |
|                           |        |                  | 2020 | 0.37  | 0.43  | 0.25 | 0.43  | 0.10  | 0.01   | 68.93 | 3.96  | 0.25      | 0.00  | 36  |   |
|                           |        | Jadebusen        | 2019 | 1.65  | 0.87  | 0.00 | 4.60  | 2.03  | 4.12   | 18.71 | 6.02  | 0.56      | 4.47  | 106 |   |
|                           |        |                  | 2020 | 6.12  | 3.20  | 2.75 | 12.40 | 5.45  | 29.66  | 18.72 | 5.80  | 2.75      | 0.00  | 44  |   |
|                           |        | Tettens          | 2019 | -     | -     | -    | -     | -     | -      | -     | -     | -         | -     | -   | 0 |
|                           |        |                  | 2020 | -     | -     | -    | -     | -     | -      | -     | -     | -         | -     | -   | 0 |
|                           |        | Cappel-Neufeld   | 2019 | 0.90  | 0.80  | 0.20 | 2.33  | 0.86  | 0.73   | 39.90 | 10.40 | 0.24      | 1.60  | 78  |   |

|                           |               |                  |      |       |       |       |            |       |        |        |       |           |       |     |
|---------------------------|---------------|------------------|------|-------|-------|-------|------------|-------|--------|--------|-------|-----------|-------|-----|
|                           |               |                  | 2020 | 0.74  | 0.74  | 0.00  | 1.47       | 1.04  | 1.08   | 41.42  | 11.22 | 0.00      | 0.00  | 20  |
| <i>Mytilus edulis</i>     | filter feeder | Knockster Tief   | 2019 | 15.83 | 9.40  | 1.40  | 57.25      | 14.96 | 223.78 | 33.75  | 15.10 | 5.15      | 23.45 | 117 |
|                           |               |                  | 2020 | 11.03 | 8.40  | 0.00  | 56.00      | 15.51 | 240.48 | 53.49  | 16.12 | 0.40      | 14.40 | 60  |
|                           |               | Leybucht         | 2019 | 13.70 | 12.90 | 1.20  | 37.25      | 10.61 | 112.60 | 46.08  | 14.42 | 5.26      | 21.10 | 67  |
|                           |               |                  | 2020 | 1.15  | 0.00  | 0.00  | 4.00       | 1.57  | 2.47   | 37.99  | 21.77 | 0.00      | 2.40  | 60  |
|                           |               | Neuharlingersiel | 2019 | 45.81 | 42.00 | 36.25 | 62.20      | 10.59 | 112.18 | 40.29  | 16.85 | 37.3<br>2 | 56.20 | 24  |
|                           |               |                  | 2020 | 3.06  | 0.09  | 0.00  | 16.00      | 5.23  | 27.35  | 21.66  | 7.56  | 0.00      | 5.95  | 49  |
|                           |               | Jadebusen        | 2019 | 6.60  | 5.60  | 1.80  | 13.60      | 3.48  | 12.12  | 22.99  | 8.16  | 3.80      | 9.00  | 113 |
|                           |               |                  | 2020 | 0.31  | 0.40  | 0.00  | 0.80       | 0.32  | 0.10   | 21.22  | 6.94  | 0.00      | 0.50  | 33  |
|                           |               | Tettens          | 2019 | 13.98 | 10.10 | 2.40  | 31.80      | 10.01 | 100.24 | 36.18  | 17.32 | 6.65      | 21.70 | 50  |
|                           |               |                  | 2020 | 5.68  | 5.44  | 0.00  | 12.20      | 5.26  | 27.70  | 33.92  | 13.21 | 0.00      | 11.30 | 31  |
|                           |               | Cappel-Neufeld   | 2019 | 16.53 | 10.60 | 3.60  | 54.00      | 13.99 | 195.81 | 37.67  | 16.23 | 8.50      | 18.60 | 53  |
|                           |               |                  | 2020 | 3.53  | 1.14  | 0.00  | 14.60      | 5.28  | 27.92  | 53.93  | 21.16 | 0.00      | 4.60  | 37  |
| <i>Platichthys flesus</i> | demersal      | Borkum           | 2018 | 9.06  | 6.00  | 0.00  | 45.00      | 10.40 | 108.19 | 140.44 | 7.50  | 2.00      | 12.00 | 47  |
|                           |               |                  | 2020 | 4.63  | 1.00  | 0.00  | 24.00      | 6.81  | 46.34  | 164.78 | 9.38  | 0.00      | 6.00  | 41  |
|                           |               | Baltrum          | 2018 | 8.43  | 4.00  | 0.00  | 44.00      | 10.03 | 100.63 | 164.11 | 8.28  | 1.00      | 11.50 | 53  |
|                           |               |                  | 2020 | 18.07 | 8.00  | 0.00  | 156.0<br>0 | 28.49 | 811.67 | 140.19 | 11.24 | 1.00      | 24.00 | 41  |
|                           |               | Außenjade        | 2018 | 16.02 | 11.00 | 0.00  | 89.00      | 18.11 | 328.12 | 174.14 | 11.38 | 5.00      | 18.00 | 43  |

|  |  |            |      |       |      |      |       |       |        |        |       |      |       |    |
|--|--|------------|------|-------|------|------|-------|-------|--------|--------|-------|------|-------|----|
|  |  |            | 2020 | -     | -    | -    | -     | -     | -      | -      | -     | -    | -     | 0  |
|  |  | Außenweser | 2018 | 10.73 | 5.50 | 0.00 | 55.00 | 12.92 | 166.90 | 181.79 | 14.66 | 0.00 | 17.75 | 44 |
|  |  |            | 2020 | 9.56  | 6.00 | 0.00 | 61.00 | 13.26 | 175.95 | 177.72 | 11.41 | 0.00 | 11.00 | 41 |

**Table S2. (b)** Descriptive statistics of MP fibers (items/individual) in biota.

| Species                 | Feeding Type   | Location         | Year | Mean | Median | Min  | Max  | Stdev | Variance | Mean gross weight | Mean net weight | 1 <sup>st</sup> . qu. | 3 <sup>rd</sup> . qu. | N  |
|-------------------------|----------------|------------------|------|------|--------|------|------|-------|----------|-------------------|-----------------|-----------------------|-----------------------|----|
| <i>Arenicola marina</i> | deposit feeder | Knockster Tief   | 2019 | 1.24 | 1.00   | 0.00 | 3.33 | 1.20  | 1.43     | 17.38             | -               | 0.00                  | 2.00                  | 21 |
|                         |                |                  | 2020 | 0.47 | 0.33   | 0.00 | 1.00 | 0.38  | 0.15     | 7.69              | -               | 0.16                  | 0.83                  | 13 |
|                         |                | Leybucht         | 2019 | 1.23 | 1.00   | 0.97 | 0.94 | 0.00  | 4.00     | 2.37              | -               | 0.62                  | 1.67                  | 53 |
|                         |                |                  | 2020 | 0.24 | 0.00   | 0.00 | 1.40 | 0.46  | 0.22     | 14.36             | -               | 0.00                  | 0.36                  | 33 |
|                         |                | Neuharlingersiel | 2019 | 0.90 | 0.67   | 0.00 | 2.67 | 0.76  | 0.58     | 2.40              | -               | 0.33                  | 1.33                  | 39 |
|                         |                |                  | 2020 | 0.37 | 0.40   | 0.17 | 0.60 | 0.19  | 0.03     | 24.47             | -               | 0.18                  | 0.55                  | 25 |
|                         |                | Jadebusen        | 2019 | -    | -      | -    | -    | -     | -        | -                 | -               | -                     | -                     | 0  |
|                         |                |                  | 2020 | -    | -      | -    | -    | -     | -        | -                 | -               | -                     | -                     | 0  |
|                         |                | Tettens          | 2019 | 0.51 | 0.33   | 0.00 | 3.33 | 0.97  | 0.94     | 0.51              | -               | 0.00                  | 0.67                  | 32 |
|                         |                |                  | 2020 | 0.50 | 0.17   | 0.00 | 2.33 | 0.82  | 0.67     | 0.50              | -               | 0.00                  | 0.83                  | 24 |
|                         |                | Cappel-Neufeld   | 2019 | 0.59 | 0.00   | 0.00 | 2.33 | 0.88  | 0.77     | 0.59              | -               | 0.00                  | 1.33                  | 28 |
|                         |                |                  | 2020 | 0.45 | 0.33   | 0.00 | 1.33 | 0.46  | 0.21     | 0.45              | -               | 0.00                  | 0.87                  | 40 |

|                           |               |                  |      |      |      |      |      |      |      |       |       |      |      |     |
|---------------------------|---------------|------------------|------|------|------|------|------|------|------|-------|-------|------|------|-----|
| <i>Littorina littorea</i> | grazer        | Knockster Tief   | 2019 | 0.21 | 0.14 | 0.00 | 0.57 | 0.24 | 0.06 | 0.21  | 5.85  | 0.00 | 0.43 | 61  |
|                           |               |                  | 2020 | 0.02 | 0.00 | 0.00 | 0.07 | 0.04 | 0.00 | 0.02  | 3.93  | 0.00 | 0.00 | 45  |
|                           |               | Leybucht         | 2019 | 0.27 | 0.33 | 0.00 | 0.53 | 0.26 | 0.07 | 0.27  | 11.90 | 0.00 | 0.51 | 68  |
|                           |               |                  | 2020 | 0.00 | 0.00 | 0.00 | 0.00 | 0.00 | 0.00 | 0.00  | 7.76  | 0.00 | 0.00 | 45  |
|                           |               | Neuharlingersiel | 2019 | 0.24 | 0.14 | 0.07 | 0.60 | 0.22 | 0.05 | 0.24  | 6.16  | 0.07 | 0.45 | 80  |
|                           |               |                  | 2020 | 0.00 | 0.00 | 0.00 | 0.00 | 0.00 | 0.00 | 0.00  | 3.96  | 0.00 | 0.00 | 36  |
|                           |               | Jadebusen        | 2019 | 0.10 | 0.07 | 0.00 | 0.27 | 0.11 | 0.01 | 0.10  | 6.02  | 0.00 | 0.20 | 106 |
|                           |               |                  | 2020 | 0.23 | 0.20 | 0.00 | 0.50 | 0.25 | 0.06 | 0.23  | 5.80  | 0.00 | 0.00 | 44  |
|                           |               | Tettens          | 2019 | -    | -    | -    | -    | -    | -    | -     | -     | -    | -    | 0   |
|                           |               |                  | 2020 | -    | -    | -    | -    | -    | -    | -     | -     | -    | -    | 0   |
|                           |               | Cappel-Neufeld   | 2019 | 0.03 | 0.00 | 0.00 | 0.07 | 0.04 | 0.00 | 39.90 | 10.40 | 0.00 | 0.07 | 78  |
|                           |               |                  | 2020 | 0.10 | 0.10 | 0.00 | 0.20 | 0.14 | 0.02 | 41.42 | 11.22 | 0.00 | 0.00 | 20  |
| <i>Mytilus edulis</i>     | filter feeder | Knockster Tief   | 2019 | 0.68 | 0.55 | 0.20 | 2.00 | 0.52 | 0.27 | 33.75 | 15.10 | 0.28 | 0,95 | 117 |
|                           |               |                  | 2020 | 0.20 | 0.20 | 0.00 | 0.60 | 0.21 | 0.04 | 53.49 | 16.12 | 0.00 | 0.40 | 60  |
|                           |               | Leybucht         | 2019 | 0.43 | 0.40 | 0.00 | 1.40 | 0.35 | 0.13 | 46.08 | 14.42 | 0.20 | 0.56 | 67  |
|                           |               |                  | 2020 | 0.05 | 0.00 | 0.00 | 0.60 | 0.17 | 0.03 | 37.99 | 21.77 | 0.00 | 0.00 | 60  |
|                           |               | Neuharlingersiel | 2019 | 0.28 | 0.00 | 0.00 | 0.80 | 0.39 | 0.15 | 40.29 | 16.85 | 0.00 | 0.70 | 24  |
|                           |               |                  | 2020 | 0.06 | 0.00 | 0.00 | 0.40 | 0.13 | 0.02 | 21.66 | 7.56  | 0.00 | 0.04 | 49  |
|                           |               | Jadebusen        | 2019 | 0.60 | 0.60 | 0.20 | 1.60 | 0.34 | 0.12 | 22.99 | 8.16  | 0.40 | 0.80 | 113 |

|                           |              |                |      |      |      |      |      |      |      |        |       |      |      |    |
|---------------------------|--------------|----------------|------|------|------|------|------|------|------|--------|-------|------|------|----|
|                           |              |                | 2020 | 0.13 | 0.00 | 0.00 | 0.50 | 0.22 | 0.05 | 21.22  | 6.94  | 0.00 | 0.40 | 33 |
|                           |              | Tettens        | 2019 | 0.34 | 0.40 | 0.00 | 1.00 | 0.39 | 0.15 | 36.18  | 17.32 | 0.00 | 0.60 | 50 |
|                           |              |                | 2020 | 0.18 | 0.10 | 0.00 | 0.50 | 0.22 | 0.05 | 33.92  | 13.21 | 0.00 | 0.42 | 31 |
|                           |              | Cappel-Neufeld | 2019 | 0.63 | 0.60 | 0.00 | 1.40 | 0.39 | 0.15 | 37.67  | 16.23 | 0.40 | 0.83 | 53 |
|                           |              |                | 2020 | 0.05 | 0.00 | 0.00 | 0.20 | 0.08 | 0.01 | 53.93  | 21.16 | 0.00 | 0.14 | 37 |
| <i>Platichthys flesus</i> | demersa<br>1 | Borkum         | 2018 | 0.40 | 0.00 | 0.00 | 3.00 | 0.74 | 0.55 | 140.44 | 7.50  | 0.00 | 1.00 | 47 |
|                           |              |                | 2020 | 0.12 | 0.00 | 0.00 | 3.00 | 0.51 | 0.26 | 164.78 | 9.38  | 0.00 | 0.00 | 41 |
|                           |              | Baltrum        | 2018 | 0.39 | 0.00 | 0.00 | 2.00 | 0.63 | 0.39 | 164.11 | 8.28  | 0.00 | 1.00 | 53 |
|                           |              |                | 2020 | 0.40 | 0.00 | 0.00 | 2.00 | 0.63 | 0.40 | 140.19 | 11.24 | 0.00 | 0.00 | 41 |
|                           |              | Außenjade      | 2018 | 0.51 | 0.00 | 0.00 | 5.00 | 0.96 | 0.92 | 174.14 | 11.38 | 0.00 | 1.00 | 43 |
|                           |              |                | 2020 | -    | -    | -    | -    | -    | -    | -      | -     | -    | -    | 0  |
|                           |              | Außenweser     | 2018 | 0.34 | 0.00 | 0.00 | 4.00 | 0.78 | 0.60 | 181.79 | 14.66 | 0.00 | 0.00 | 44 |
|                           |              |                | 2020 | 0.24 | 0.00 | 0.00 | 5.00 | 0.83 | 0.69 | 177.72 | 11.41 | 0.00 | 0.00 | 41 |

**Table S2. (c)** Descriptive statistics of MP fragments (items/individual) in biota.

| Species                 | Feeding Type | Location       | Year | Mean  | Median | Min  | Max   | Stdev | Variance | Mean gross weight | Mean net weight | 1 <sup>st</sup> . qu. | 3 <sup>rd</sup> . qu. | N  |
|-------------------------|--------------|----------------|------|-------|--------|------|-------|-------|----------|-------------------|-----------------|-----------------------|-----------------------|----|
| <i>Arenicola marina</i> |              | Knockster Tief | 2019 | 12.71 | 2.33   | 0.00 | 78.33 | 21.81 | 475.86   | 17.38             | -               | 0.00                  | 17.50                 | 21 |

|                           |                |                      |      |       |      |      |       |       |        |       |       |      |       |     |
|---------------------------|----------------|----------------------|------|-------|------|------|-------|-------|--------|-------|-------|------|-------|-----|
|                           | deposit feeder |                      | 2020 | 9.93  | 0.33 | 0.00 | 51.00 | 16.64 | 276.76 | 7.69  | -     | 0.00 | 20.16 | 13  |
|                           |                | Leybucht             | 2019 | 12.38 | 4.50 | 0.00 | 60.00 | 16.01 | 256.46 | 2.37  | -     | 0.00 | 22.08 | 53  |
|                           |                |                      | 2020 | 1.95  | 0.00 | 0.00 | 14.40 | 3.91  | 15.28  | 14.36 | -     | 0.00 | 1.80  | 33  |
|                           |                | Neuharlingersie<br>l | 2019 | 17.72 | 5.17 | 0.00 | 66.67 | 22.60 | 510.80 | 2.40  | -     | 0.50 | 31.41 | 39  |
|                           |                |                      | 2020 | 0.89  | 0.50 | 0.00 | 3.00  | 1.07  | 1.14   | 24.47 | -     | 0.00 | 1.62  | 25  |
|                           |                | Jadebusen            | 2019 | -     | -    | -    | -     | -     | -      | -     | -     | -    | -     | 0   |
|                           |                |                      | 2020 | -     | -    | -    | -     | -     | -      | -     | -     | -    | -     | 0   |
|                           |                | Tettens              | 2019 | 4.95  | 0.00 | 0.00 | 50.33 | 11.57 | 133.89 | 0.51  | -     | 0.00 | 5.83  | 32  |
|                           |                |                      | 2020 | 5.08  | 0.67 | 0.00 | 24.00 | 8.09  | 65.41  | 0.50  | -     | 0.00 | 8.66  | 24  |
|                           |                | Cappel-Neufeld       | 2019 | 12.28 | 4.50 | 0.00 | 89.33 | 21.58 | 465.87 | 0.59  | -     | 0.33 | 18.17 | 28  |
|                           |                |                      | 2020 | 2.95  | 0.29 | 0.00 | 20.33 | 5.13  | 26.35  | 0.45  | -     | 0.00 | 4.06  | 40  |
| <i>Littorina littorea</i> | grazer         | Knockster Tief       | 2019 | 0.77  | 0.20 | 0.00 | 3.86  | 1.17  | 1.38   | 0.21  | 5.85  | 0.00 | 1.20  | 61  |
|                           |                |                      | 2020 | 0.25  | 0.20 | 0.00 | 0.60  | 0.28  | 0.08   | 0.02  | 3.93  | 0.00 | 0.50  | 45  |
|                           |                | Leybucht             | 2019 | 2.44  | 0.57 | 0.00 | 10.33 | 3.46  | 11.98  | 0.27  | 11.90 | 0.04 | 4.82  | 68  |
|                           |                |                      | 2020 | 0.57  | 0.00 | 0.00 | 2.07  | 0.91  | 0.83   | 0.00  | 7.76  | 0.00 | 1.51  | 45  |
|                           |                | Neuharlingersie<br>l | 2019 | 1.64  | 1.20 | 0.07 | 5.40  | 1.79  | 3.19   | 0.24  | 6.16  | 0.08 | 2.41  | 80  |
|                           |                |                      | 2020 | 0.19  | 0.16 | 0.00 | 0.43  | 0.19  | 0.04   | 0.00  | 3.96  | 0.00 | 0.37  | 36  |
|                           |                | Jadebusen            | 2019 | 0.78  | 0.20 | 0.00 | 4.33  | 1.56  | 2.44   | 0.10  | 6.02  | 0.00 | 0.90  | 106 |
|                           |                |                      | 2020 | 2.94  | 1.13 | 0.00 | 12.20 | 4.69  | 22.00  | 0.23  | 5.80  | 0.15 | 5.30  | 44  |

|                           |               |                      |      |       |       |      |       |       |        |        |       |      |       |     |
|---------------------------|---------------|----------------------|------|-------|-------|------|-------|-------|--------|--------|-------|------|-------|-----|
|                           |               | Tettens              | 2019 | -     | -     | -    | -     | -     | -      | -      | -     | -    | -     | 0   |
|                           |               |                      | 2020 | -     | -     | -    | -     | -     | -      | -      | -     | -    | -     | 0   |
|                           |               | Cappel-Neufeld       | 2019 | 0.43  | 0.13  | 0.00 | 2.27  | 0.70  | 0.49   | 39.90  | 10.40 | 0.00 | 0.73  | 78  |
|                           |               |                      | 2020 | 0.32  | 0.04  | 0.00 | 1.40  | 0.73  | 0.53   | 41.42  | 11.22 | 0.00 | 1.06  | 20  |
| <i>Mytilus edulis</i>     | filter feeder | Knockster Tief       | 2019 | 7.58  | 2.10  | 0.00 | 54.50 | 12.42 | 154.29 | 33.75  | 15.10 | 0.00 | 8.20  | 117 |
|                           |               |                      | 2020 | 5.42  | 0.40  | 0.00 | 55.40 | 11.86 | 140.58 | 53.49  | 16.12 | 0.00 | 8.75  | 60  |
|                           |               | Leybucht             | 2019 | 6.64  | 1.28  | 0.00 | 35.00 | 9.62  | 92.61  | 46.08  | 14.42 | 0.00 | 13.30 | 67  |
|                           |               |                      | 2020 | 0.55  | 0.00  | 0.00 | 4.00  | 1.17  | 1.37   | 37.99  | 21.77 | 0.00 | 0.00  | 60  |
|                           |               | Neuharlingersie<br>l | 2019 | 22.77 | 19.18 | 1.50 | 58.60 | 22.25 | 495.17 | 40.29  | 16.85 | 2.70 | 40.50 | 24  |
|                           |               |                      | 2020 | 1.50  | 0.00  | 0.00 | 16.00 | 3.93  | 15.44  | 21.66  | 7.56  | 0.00 | 0.00  | 49  |
|                           |               | Jadebusen            | 2019 | 3.00  | 1.00  | 0.00 | 12.20 | 3.72  | 13.81  | 22.99  | 8.16  | 0.00 | 5.25  | 113 |
|                           |               |                      | 2020 | 0.09  | 0.00  | 0.00 | 0.80  | 0.24  | 0.06   | 21.22  | 6.94  | 0.00 | 0.00  | 33  |
|                           |               | Tettens              | 2019 | 6.82  | 3.00  | 0.00 | 29.80 | 8.95  | 80.12  | 36.18  | 17.32 | 0.25 | 9.15  | 50  |
|                           |               |                      | 2020 | 2.75  | 0.10  | 0.00 | 11.00 | 4.27  | 18.24  | 33.92  | 13.21 | 0.00 | 5.57  | 31  |
|                           |               | Cappel-Neufeld       | 2019 | 7.95  | 2.98  | 0.00 | 50.50 | 11.74 | 137.75 | 37.67  | 16.23 | 0.15 | 11.65 | 53  |
|                           |               |                      | 2020 | 1.74  | 0.00  | 0.00 | 14.60 | 4.02  | 16.19  | 53.93  | 21.16 | 0.00 | 1.80  | 37  |
| <i>Platichthys flesus</i> | demersal      | Borkum               | 2018 | 4.33  | 0.00  | 0.00 | 43.00 | 8.26  | 68.16  | 140.44 | 7.50  | 0.00 | 5.25  | 47  |
|                           |               |                      | 2020 | 2.26  | 0.00  | 0.00 | 24.00 | 5.22  | 27.21  | 164.78 | 9.38  | 0.00 | 1.00  | 41  |
|                           |               | Baltrum              | 2018 | 4.02  | 0.00  | 0.00 | 42.00 | 7.88  | 62.02  | 164.11 | 8.28  | 0.00 | 4.00  | 53  |

|  |  |            |      |      |      |      |        |       |        |        |       |      |       |    |
|--|--|------------|------|------|------|------|--------|-------|--------|--------|-------|------|-------|----|
|  |  |            | 2020 | 8.98 | 0.00 | 0.00 | 152.00 | 21.44 | 459.68 | 140.19 | 11.24 | 0.00 | 8.00  | 41 |
|  |  | Außenjade  | 2018 | 7.76 | 1.00 | 0.00 | 88.00  | 14.44 | 208.47 | 174.14 | 11.38 | 0.00 | 11.00 | 43 |
|  |  |            | 2020 | -    | -    | -    | -      | -     | -      | -      | -     | -    | -     | 0  |
|  |  | Außenweser | 2018 | 5.19 | 0.00 | 0.00 | 51.00  | 10.18 | 103.72 | 181.79 | 14.66 | 0.00 | 5.00  | 44 |
|  |  |            | 2020 | 4.66 | 0.00 | 0.00 | 52.00  | 9.60  | 92.23  | 177.72 | 11.41 | 0.00 | 6.00  | 41 |



**Table S3.** Amount of particles, fragments, fibers and microbeads in sediment samples.

| Location                | Year | Depth | Particles per kg DW | Fragments per kg DW | Fibers per kg DW | Microbeads per kg DW |
|-------------------------|------|-------|---------------------|---------------------|------------------|----------------------|
| <i>Knockster Tief</i>   | 2019 | 0-5   | 3,268               | 2,733               | 493              | 41                   |
|                         |      | 5-10  | 2,635               | 2,210               | 405              | 20                   |
|                         |      | 10-15 | 1,458               | 1,349               | 87               | 22                   |
|                         |      | 15-20 | 3,793               | 2,919               | 762              | 112                  |
|                         | 2020 | 0-5   | 2,424               | 2,255               | 94               | 75                   |
|                         |      | 5-10  | 2,392               | 2,283               | 91               | 18                   |
|                         |      | 10-15 | 1,637               | 1,425               | 106              | 106                  |
|                         |      | 15-20 | 3,437               | 3,237               | 153              | 46                   |
|                         |      | 20-25 | 1,620               | 1,451               | 135              | 34                   |
|                         |      |       |                     |                     |                  |                      |
| <i>Leybucht</i>         | 2019 | 0-5   | 2,523               | 1,949               | 544              | 30                   |
|                         |      | 5-10  | 2,719               | 2,056               | 578              | 85                   |
|                         |      | 10-15 | 3,592               | 3,024               | 458              | 110                  |
|                         |      | 15-20 | 3,177               | 2,854               | 247              | 76                   |
|                         |      | 20-25 | 5,632               | 4,756               | 647              | 228                  |
|                         | 2020 | 0-5   | 3,468               | 2,843               | 406              | 219                  |
|                         |      | 5-10  | 3,226               | 2,517               | 284              | 425                  |
|                         |      | 10-15 | 2,830               | 2,523               | 243              | 65                   |
|                         |      | 15-20 | 2,083               | 1,697               | 370              | 17                   |
|                         |      | 20-25 | 2,122               | 1,833               | 145              | 145                  |
|                         |      | 25-30 | 4,344               | 3,942               | 302              | 101                  |
|                         |      |       |                     |                     |                  |                      |
| <i>Neuharlingersiel</i> | 2019 | 0-5   | 2,387               | 2,119               | 134              | 134                  |
|                         |      | 5-10  | 1,710               | 1,640               | 71               | 0                    |
|                         |      | 10-15 | 2,076               | 1,627               | 411              | 37                   |
|                         |      | 15-20 | 5,150               | 4,419               | 365              | 365                  |
|                         |      | 20-25 | 4,383               | 4,000               | 213              | 170                  |
|                         | 2020 | 0-5   | 1,813               | 1,656               | 94               | 63                   |
|                         |      | 5-10  | 2,832               | 2,406               | 305              | 122                  |
|                         |      | 10-15 | 1,822               | 1,372               | 379              | 71                   |
|                         |      | 15-20 | 2,401               | 2,173               | 143              | 86                   |

|                |      |       |       |       |     |       |
|----------------|------|-------|-------|-------|-----|-------|
| Jadebusen      | 2019 | 0-5   | 5,456 | 4,430 | 349 | 677   |
|                |      | 5-10  | 1,938 | 1,588 | 117 | 234   |
|                |      | 10-15 | 4,160 | 3,499 | 220 | 440   |
|                |      | 15-20 | 7,392 | 5,959 | 493 | 941   |
|                |      | 20-25 | 2,908 | 2,529 | 190 | 190   |
|                | 2020 | 0-5   | 4,842 | 4,447 | 264 | 132   |
|                |      | 5-10  | 8,128 | 7,155 | 661 | 311   |
|                |      | 10-15 | 4,557 | 4,210 | 217 | 130   |
| Tettens        | 2019 | 0-5   | 4,620 | 4,018 | 563 | 39    |
|                |      | 5-10  | 3,743 | 2,894 | 848 | 0     |
|                |      | 10-15 | 3,462 | 3,017 | 444 | 0     |
|                |      | 15-20 | 3,851 | 3,667 | 183 | 0     |
|                |      | 20-25 | 4,619 | 4,077 | 541 | 0     |
|                |      | 25-30 | 4,069 | 3,732 | 337 | 0     |
|                | 2020 | 0-5   | 2,889 | 2,756 | 133 | 0     |
|                |      | 5-10  | 1,232 | 1,211 | 21  | 0     |
|                |      | 10-15 | 2,379 | 2,311 | 68  | 0     |
| Cappel-Neufeld | 2019 | 0-5   | 2,103 | 1,840 | 234 | 29    |
|                |      | 5-10  | 747   | 685   | 62  | 0     |
|                |      | 10-15 | 242   | 242   | 0   | 0     |
|                |      | 15-20 | 132   | 132   | 0   | 0     |
|                |      | 20-25 | 0     | 0     | 0   | 0     |
|                |      | 25-30 | 0     | 0     | 0   | 0     |
|                | 2020 | 0-5   | 5,750 | 4,443 | 105 | 1,202 |
|                |      | 5-10  | 503   | 406   | 58  | 39    |
|                |      | 10-15 | 55    | 55    | 0   | 0     |
|                |      | 15-20 | 41    | 20    | 20  | 0     |
